# Supplementary material
Source: Springer Nature journal article supplement (https://www.springermedizin.de/resource/supplementary/12935_2007_178_MOESM9_ESM.pdf/9541260)

Fold change relative to control

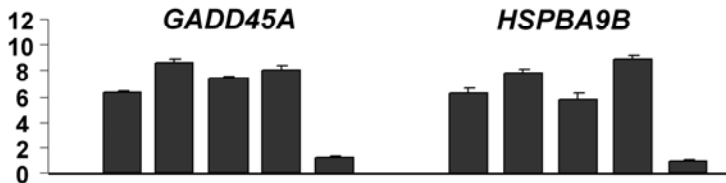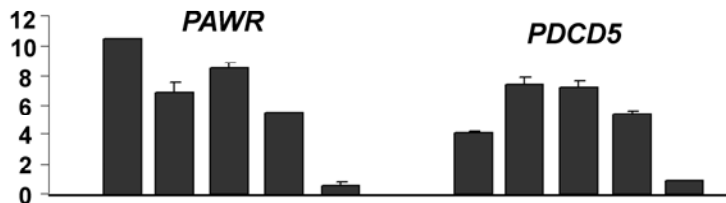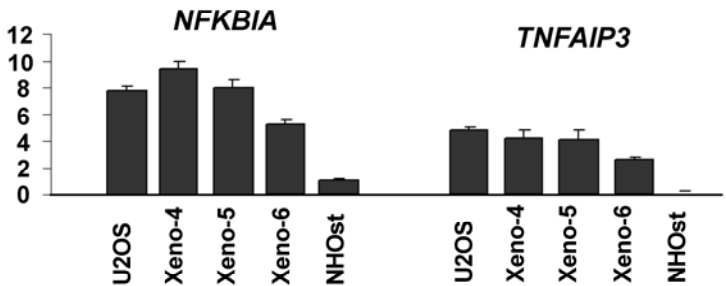

Supplement: MOESM9 [file 9541260]
